# Supplementary material for: Beyond community gardens
Source: Oxford University Press journal article supplement (doi:10.1525/elementa.2020.004), 2020-01-01
Supplement: figure_s1.docx [file figure_s1.docx]

**Supplementary Information**

**Beyond community gardens: A participatory research study evaluating nutrient and lead profiles of urban harvested fruit**

Ciaran L. Gallagher, Hannah L. Oettgen, and Dan J. Brabander

Geosciences Department, Wellesley College, Wellesley MA, US

| **a**  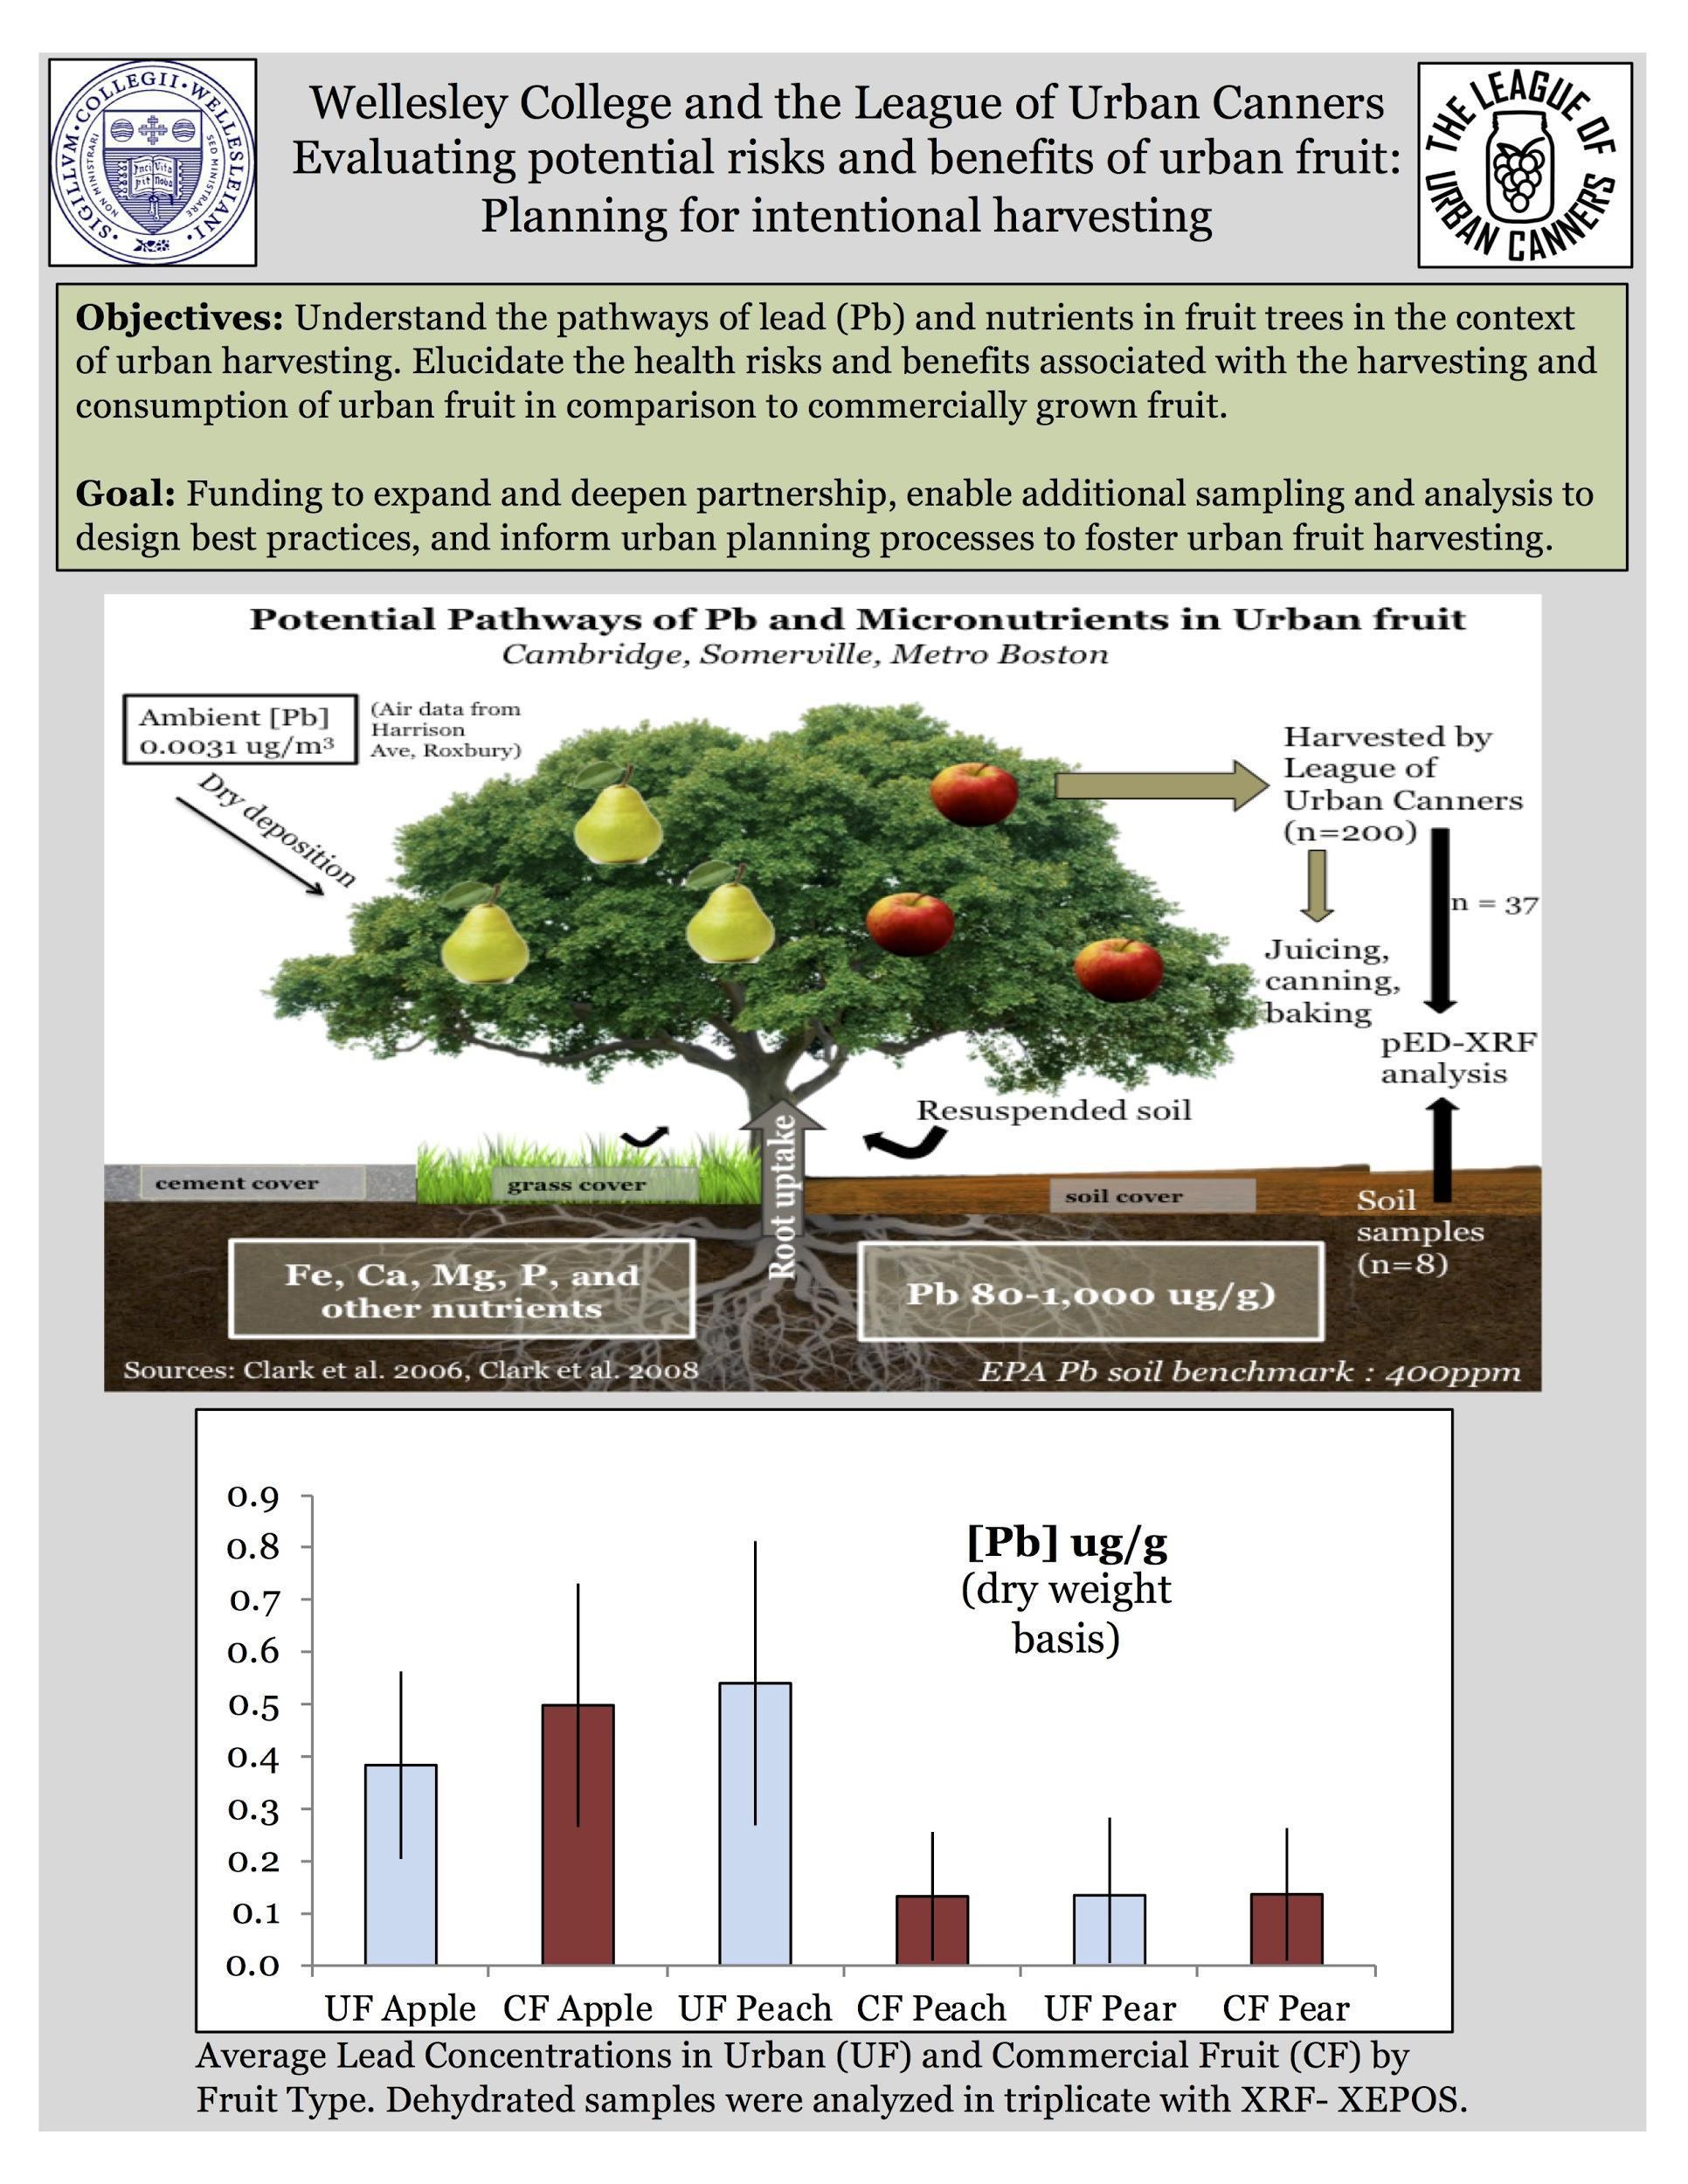 | **b**  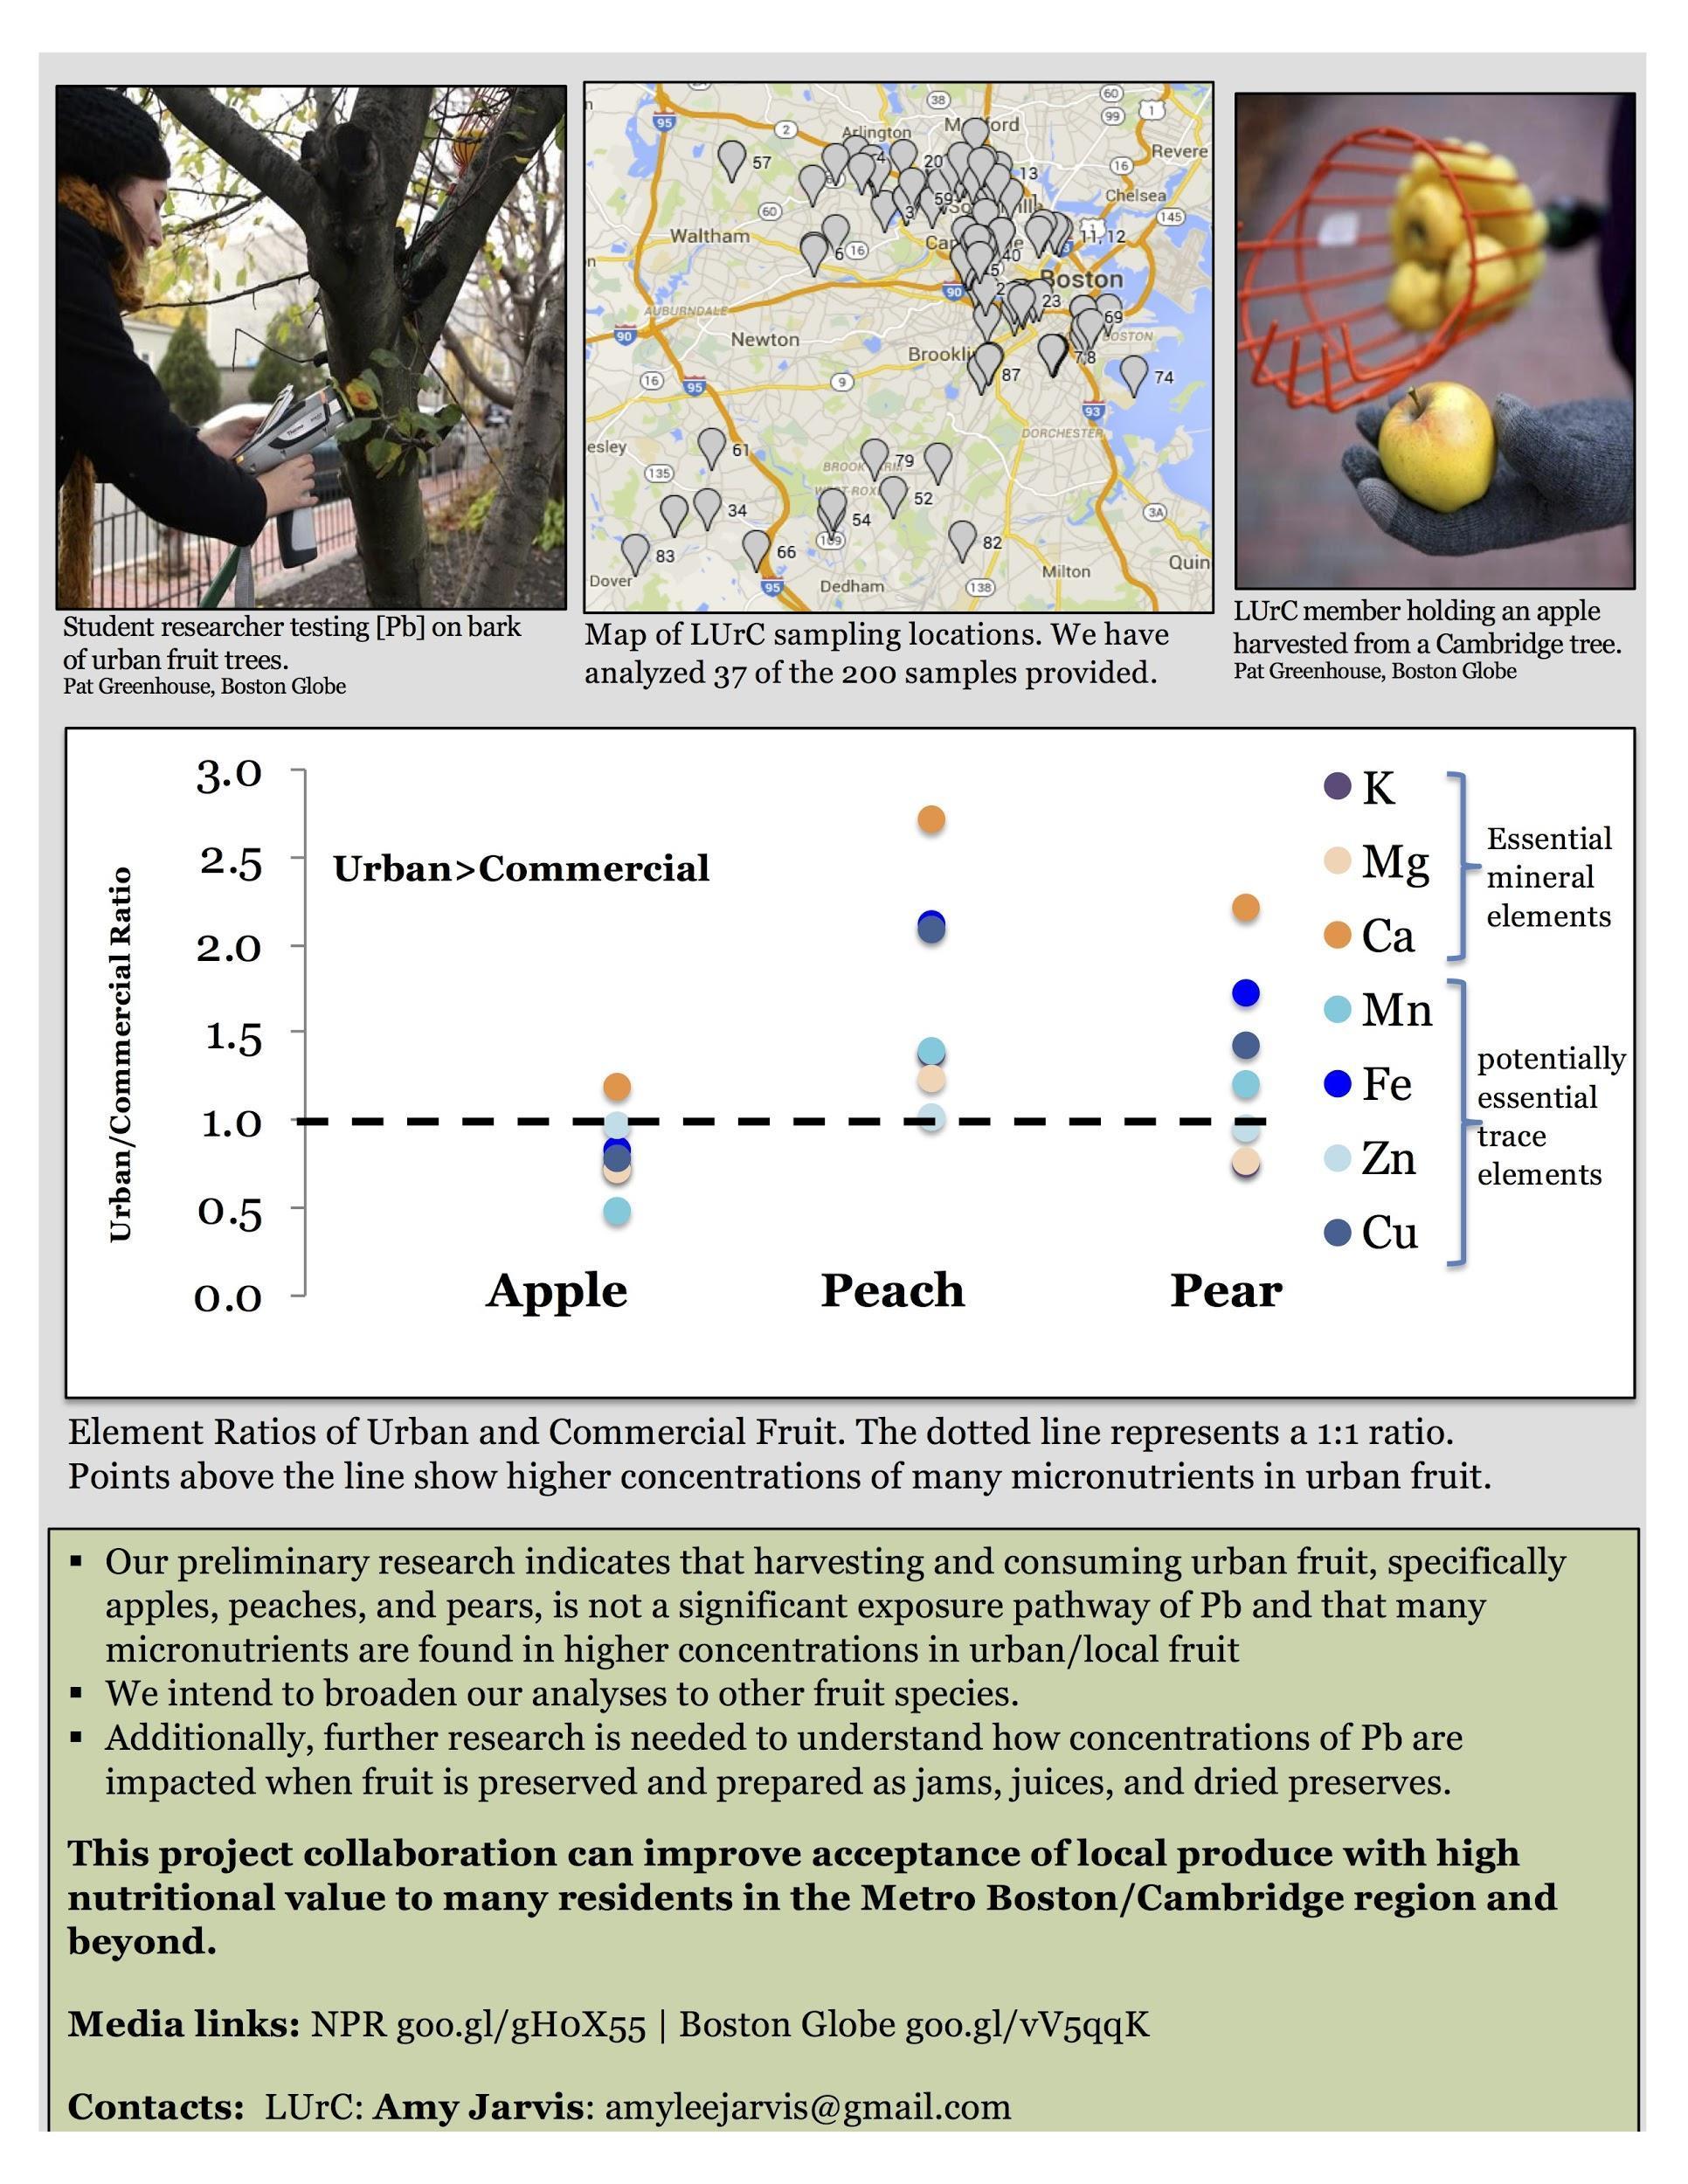 |
| --- | --- |

**Figure S1 a-b. Front and back of a sample infographic prepared in collaboration with LUrC.** This was used to communicate preliminary results and advocate for increasing community involvement with the project.
